# Supplementary material for: Dance Training Shapes Action Perception and Its Neural Implementation within the Young and Older Adult Brain
Source: Hindawi journal article supplement (doi:10.1155/2018/5459106), 2018-07-12
Supplement: f1 [file 5459106.f1.pdf]

## Supplementary Materials

**Supplementary Table. Regions that can accurately discriminate better between physically trained and untrained movements on Day 5. (a). Younger Adults. (b). Older Adults.**

| Region                                                                | BA        | MNI Coordinates |            |           | T-value      | Cluster Size | P FWE <sub>corr.</sub> Value |
|-----------------------------------------------------------------------|-----------|-----------------|------------|-----------|--------------|--------------|------------------------------|
|                                                                       |           | x               | y          | z         |              |              |                              |
| <i>(a) Physically trained vs Untrained in Younger Adults on Day 5</i> |           |                 |            |           |              |              |                              |
| <b>L Inferior Occipital Gyrus</b>                                     | <b>19</b> | <b>-34</b>      | <b>-80</b> | <b>-4</b> | <b>8.11</b>  | <b>7323</b>  | <b>&lt;0.001</b>             |
| R Middle Occipital Gyrus                                              | 19        | 46              | -72        | 4         | 7.96         |              |                              |
| R Middle Temporal Gyrus                                               | 19        | 48              | -62        | 14        | 7.47         |              |                              |
| <b>L Inferior Parietal Lobule</b>                                     | <b>7</b>  | <b>-30</b>      | <b>-46</b> | <b>40</b> | <b>6.29</b>  | <b>580</b>   | <b>&lt;0.001</b>             |
| L Inferior Parietal Lobule                                            | 39        | -40             | -54        | 54        | 5.67         |              |                              |
| L Superior Parietal Lobule                                            | 7         | -28             | -48        | 68        | 5.48         |              |                              |
| <b>R Superior Parietal Lobule</b>                                     | <b>1</b>  | <b>26</b>       | <b>-34</b> | <b>40</b> | <b>5.94</b>  | <b>72</b>    | <b>0.001</b>                 |
| R Superior Parietal Lobule                                            | 1         | 32              | -34        | 34        | 3.71         |              |                              |
| R Superior Parietal Lobule                                            | 6         | 18              | -38        | 40        | 3.57         |              |                              |
| <b>L Paracentral Gyrus</b>                                            | <b>6</b>  | <b>-20</b>      | <b>-14</b> | <b>56</b> | <b>5.67</b>  | <b>408</b>   | <b>&lt;0.001</b>             |
| R Supplementary Motor Area                                            | 6         | 6               | -12        | 66        | 5.64         |              |                              |
| L Paracentral Gyrus                                                   | 6         | -10             | -20        | 64        | 5.21         |              |                              |
| <b>R Superior Parietal Lobule</b>                                     | <b>7</b>  | <b>20</b>       | <b>-56</b> | <b>48</b> | <b>5.48</b>  | <b>313</b>   | <b>&lt;0.001</b>             |
| R Paracentral Gyrus                                                   | 1         | 4               | -38        | 60        | 4.79         |              |                              |
| R Superior Parietal Lobule                                            | 7         | 14              | -54        | 66        | 4.77         |              |                              |
| <b>R Precentral Gyrus</b>                                             | <b>6</b>  | <b>26</b>       | <b>-16</b> | <b>62</b> | <b>5.48</b>  | <b>274</b>   | <b>&lt;0.001</b>             |
| R Precentral Gyrus                                                    | 6         | 38              | -12        | 60        | 4.95         |              |                              |
| R Precentral Gyrus                                                    | 6         | 30              | -14        | 48        | 4.92         |              |                              |
| <b>R Middle Frontal Gyrus</b>                                         | <b>9</b>  | <b>30</b>       | <b>38</b>  | <b>44</b> | <b>5.08</b>  | <b>52</b>    | <b>0.009</b>                 |
| R Middle Frontal Gyrus                                                | 9         | 30              | 32         | 50        | 4.40         |              |                              |
| R Superior Frontal Gyrus                                              | 8         | 22              | 44         | 44        | 3.33         |              |                              |
| <b>L Inferior Parietal Lobule</b>                                     | <b>40</b> | <b>-52</b>      | <b>-34</b> | <b>42</b> | <b>4.61</b>  | <b>136</b>   | <b>&lt;0.001</b>             |
| L Inferior Parietal Lobule                                            | 40        | -44             | -30        | 26        | 4.47         |              |                              |
| L SupraMarginal Gyrus                                                 | 40        | -52             | -24        | 34        | 4.40         |              |                              |
| <i>(b) Physically trained vs Untrained in Older Adults on Day 5</i>   |           |                 |            |           |              |              |                              |
| <b>R Cuneus</b>                                                       | <b>19</b> | <b>16</b>       | <b>-78</b> | <b>32</b> | <b>10.70</b> | <b>11863</b> | <b>&lt;0.001</b>             |
| R Middle Temporal Gyrus                                               | 19        | 52              | -64        | 8         | 8.41         |              |                              |
| R Superior Occipital Gyrus                                            | 19        | 20              | -86        | 28        | 8.17         |              |                              |
| <b>L SupraMarginal Gyrus</b>                                          | <b>40</b> | <b>-54</b>      | <b>-26</b> | <b>32</b> | <b>7.65</b>  | <b>663</b>   | <b>&lt;0.001</b>             |
| L Postcentral Gyrus                                                   | 40        | -48             | -22        | 42        | 5.75         |              |                              |
| L SupraMarginal Gyrus                                                 | 40        | -60             | -26        | 38        | 4.93         |              |                              |
| <b>L Inferior Frontal Gyrus</b>                                       | <b>8</b>  | <b>-48</b>      | <b>18</b>  | <b>32</b> | <b>7.32</b>  | <b>141</b>   | <b>&lt;0.001</b>             |
| L Inferior Frontal Gyrus                                              | 44        | -42             | 24         | 24        | 5.86         |              |                              |
| L Middle Frontal Gyrus                                                |           | -34             | 18         | 32        | 4.07         |              |                              |
| <b>R SupraMarginal Gyrus</b>                                          | <b>40</b> | <b>52</b>       | <b>-38</b> | <b>26</b> | <b>5.56</b>  | <b>96</b>    | <b>&lt;0.001</b>             |
| R Superior Temporal Gyrus                                             | 39        | 52              | -46        | 20        | 5.21         |              |                              |
| R Superior Temporal Gyrus                                             | 22        | 60              | -38        | 14        | 4.17         |              |                              |
| <b>R Inferior Frontal Gyrus</b>                                       | <b>44</b> | <b>48</b>       | <b>16</b>  | <b>30</b> | <b>5.08</b>  | <b>103</b>   | <b>&lt;0.001</b>             |
| R Middle Frontal Gyrus                                                | 8         | 40              | 10         | 36        | 4.79         |              |                              |
| R Inferior Frontal Gyrus                                              | 9         | 42              | 22         | 22        | 4.51         |              |                              |
| <b>L Precentral Gyrus</b>                                             | <b>6</b>  | <b>-52</b>      | <b>2</b>   | <b>16</b> | <b>4.92</b>  | <b>54</b>    | <b>0.011</b>                 |
| L Rolandic Operculum                                                  | 44        | -44             | 4          | 14        | 3.79         |              |                              |
| L Rolandic Operculum                                                  | 6         | -46             | -4         | 14        | 3.06         |              |                              |

BA, Brodmann's area; R: right, L: left;  $P < 0.005$ , uncorrected;  $k=20$ voxels. Regions in bold font are FWE-cluster corrected at the  $p < 0.05$  level. Up to three local maxima are listed when a cluster has multiple peaks more than 8 mm apart.

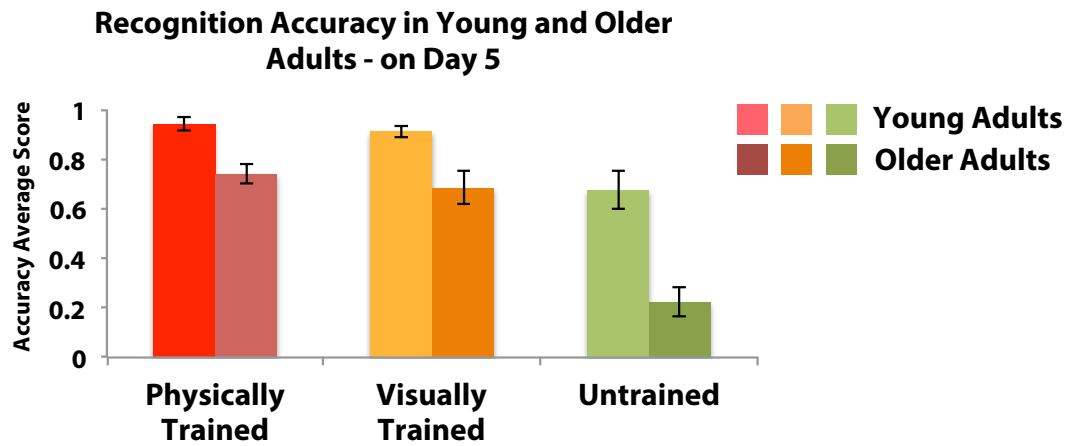

11

12 **Supplementary Figure 1. Recognition Accuracy Average Scores in Young and**  
 13 **Older Adults.** After the post-training scan on Day 5, participants watched each dance  
 14 movie stimulus again (6 per training condition) and were asked to categorize them as  
 15 either being physically trained, visually trained or untrained.
